# Supplementary material for: Using Iron-Manganese Co-Oxide Filter Film to Remove Ammonium from Surface Water
Source: MDPI journal article supplement (doi:10.3390/ijerph14070807), 2017-07-19
Supplement: s1 [file s1]

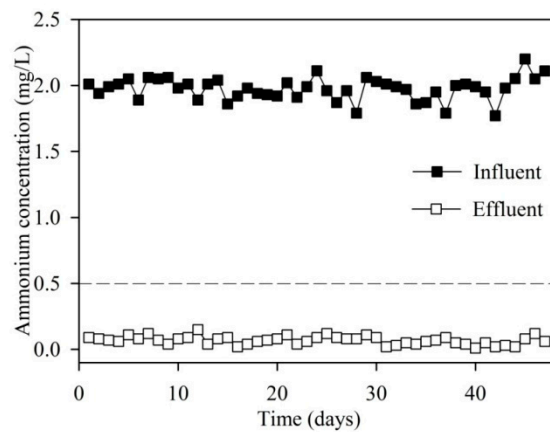

**Figure S1.** Ammonium removal performance of MeOx filter for treating groundwater. Water temperature was 18–21 °C.

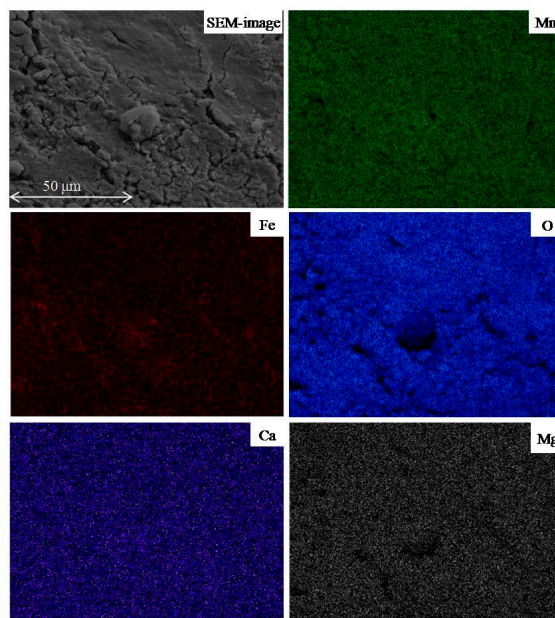

**Figure. S2** SEM and EDS mapping images of MeOx.

**Table S1.** Specific surface area, pore properties of the MeO<sub>x</sub> coated sand and normal quartz sand.

| Samples                      | Specific Surface Area<br>(m <sup>2</sup> /g) | Average Pore Diameter<br>(nm) | Pore Volume<br>(cm <sup>3</sup> /g) |
|------------------------------|----------------------------------------------|-------------------------------|-------------------------------------|
| Normal quartz sand           | 0.102                                        | 11.23                         | 0.000371                            |
| MeO <sub>x</sub> coated sand | 24.06                                        | 24.23                         | 0.145693                            |

**Table S2.** Biomass of nitrifying bacterial on MeO<sub>x</sub> before inactivation and after inactivation.

| Bacterial Species           | MPN Numbers (cells/g MeO <sub>x</sub> -coated sand) |                    | Inactivation Rate |
|-----------------------------|-----------------------------------------------------|--------------------|-------------------|
|                             | before Inactivation                                 | after Inactivation |                   |
| Ammonium-oxidizing bacteria | 2.4×10 <sup>4</sup>                                 | 200                | 99.17%            |
| Nitrite-oxidizing bacteria  | 3.8×10 <sup>4</sup>                                 | 160                | 99.58%            |

**Table S3** Comparison of the operating condition and evaluation criteria of the inactivation experiment in the study of Guo *et al.* [11] and current study.

| Reference              | Type of Water | MeO <sub>x</sub>               | Water Temperature (°C) | Influent Ammonium (mg/L) | Evaluation Criterion                              |
|------------------------|---------------|--------------------------------|------------------------|--------------------------|---------------------------------------------------|
| Guo <i>et al.</i> [11] | Groundwater   | Operating for about one year   | 18.0                   | 1.5                      | Ammonium removal rates of the whole filter system |
| This study             | Surface water | Operating for about four years | 8-10                   | 2.0                      | VARR of the 0-80 cm filter depth                  |
